# Supplementary material for: Plastidial Expression of 3β-Hydroxysteroid Dehydrogenase and Progesterone 5β-Reductase Genes Confer Enhanced Salt Tolerance in Tobacco
Source: MDPI journal article supplement (doi:10.3390/ijms222111736), 2021-10-29
Supplement: s1 [file s1]

## Supplementary Information

**Supplementary Table S1. List of primers used in this study**

| Gene name/<br>Region of interest                      | Primer name                         | Primer sequence                                                                                                                 | Comments                                                                                                | Reference                 |
|-------------------------------------------------------|-------------------------------------|---------------------------------------------------------------------------------------------------------------------------------|---------------------------------------------------------------------------------------------------------|---------------------------|
| <i>3βHSD</i>                                          | <i>3βHSD</i> -ORF                   | 5'-GGGGACAAGTTTGTACAAAAAAGCAGGCTT<br>AATGTCGTCAAAGCCAAGGTTGG-3'<br>5'-GGGGACCACTTTGTACAAGAAAGCTGGGTT<br>CTAACGCACGACGGTGAAGC-3' | Plastid transformation                                                                                  | This study                |
| <i>3βHSD</i>                                          | <i>3βHSD</i> _F<br>(forward primer) | 5'-ACGTCAGAGATGAAAAACAA-3'                                                                                                      | To confirm presence and integration of <i>3βHSD</i> gene in chloroplast genome via PCR                  | This study                |
| <i>P5βR1</i>                                          | <i>P5βR1</i> _F<br>(forward primer) | 5'-CCCATGATCCACCCTACA-3'                                                                                                        | To confirm presence and integration of <i>P5βR1</i> gene in chloroplast genome via PCR                  | This study                |
| <i>P5βR2</i>                                          | <i>P5βR2</i> _F<br>(forward primer) | 5'-TTAGACAACCTAATTCTATTACAATCTAGAAG-3')                                                                                         | To confirm presence and integration of <i>P5βR2</i> gene in chloroplast genome via PCR                  | This study                |
| Downstream of <i>trnR</i> (inside chloroplast genome) | oli252<br>(reverse primer)          | 5'-AGACAGCGACGGGTTCTCTG-3'                                                                                                      | To confirm presence and integration of <i>3βHSD</i> in chloroplast genome via PCR<br><br>End-to-end PCR | Gottschamel et al. (2013) |
| Upstream of <i>trnN</i> (inside chloroplast)          | oli253<br>(forward primer)          | 5'-GATCCGAGCCATAGAATTTC-3'                                                                                                      | To confirm presence and integration of <i>aadA</i> in chloroplast                                       | Gottschamel et al. (2013) |

|                                 |                                        |                                                                                                                                                                 |                                                                                  |                           |
|---------------------------------|----------------------------------------|-----------------------------------------------------------------------------------------------------------------------------------------------------------------|----------------------------------------------------------------------------------|---------------------------|
| genome)                         |                                        |                                                                                                                                                                 | genome via PCR<br>End-to-end PCR                                                 |                           |
| Located inside <i>aadA</i> gene | oli059<br>(reverse primer)             | 5'-TGCTGGCCGTACATTTGTACG-3'                                                                                                                                     | To confirm presence and integration of <i>aadA</i> in chloroplast genome via PCR | Gottschamel et al. (2013) |
| <i>3βHSD</i>                    | <i>3βHSD</i> -F<br><i>3βHSD</i> -R     | 5'-GCTTACACGGCTTCCAAACA-3'<br>5'- CCCTTCAAGTTAGCCCTGGA-3'                                                                                                       | For gene expression via RT-qPCR                                                  | This study                |
| <i>Actin9</i>                   | actin9-F<br>actin9-R                   | 5'-CCTGAGGTCCTTTTCCAACCA-3'<br>5'-GGATTCCGGCAGCTTCCATT-3'                                                                                                       | For gene expression via RT-qPCR                                                  | Fuentes et al. (2016)     |
| <i>3βHSD</i>                    | <i>3βHSD</i> -F<br><br><i>3βHSD</i> -R | 5'-<br>GGGGACAAGTTTGTACAAAAAAGCAGGCTTA <sub>at</sub><br>gtcgtcaaagccaaggttg-3'<br><br>5'-<br>GGGGACCACTTTGTACAAGAAAGCTGGGTT <sub>acg</sub><br>cacgacggtgaagc-3' | Sub cellular localization                                                        | This study                |

## Supplementary Figures

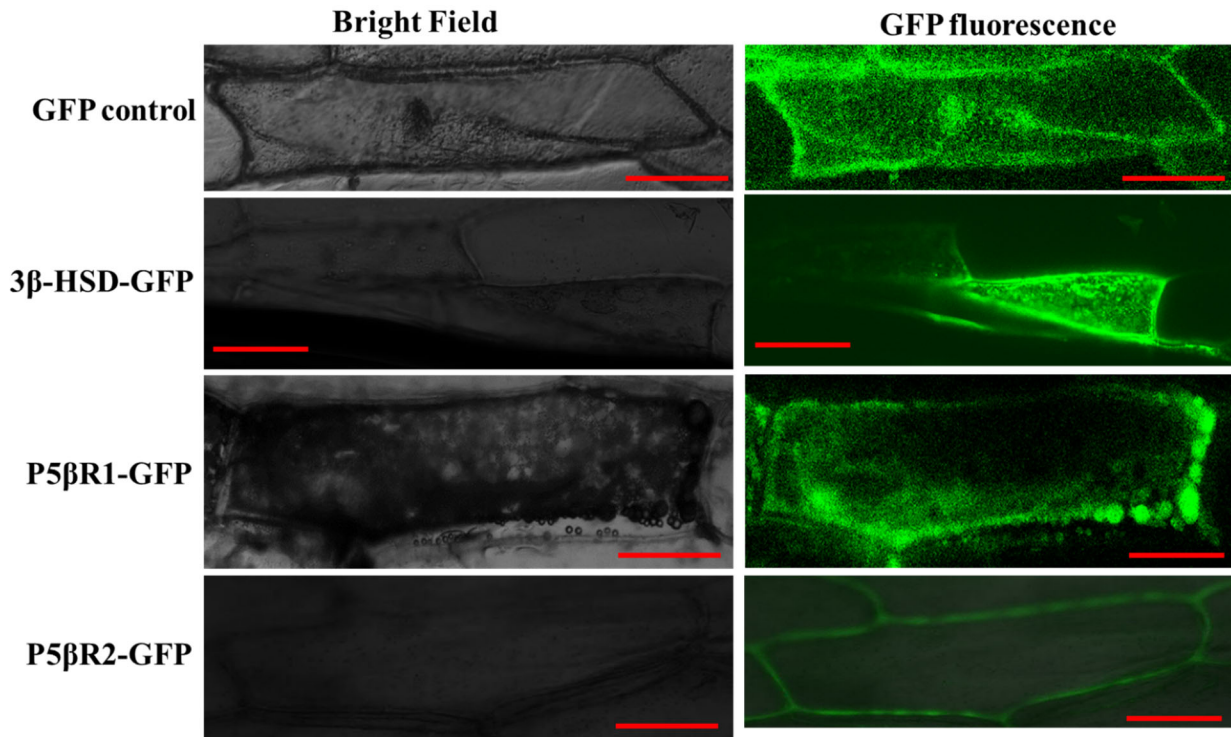

**Supplementary Figure S1. Subcellular localization of *GFP* (upper panel) and *3 $\beta$ -HSD-GFP*, *P5 $\beta$ R1-GFP* and *P5 $\beta$ R2-GFP* (lower panel) transiently expressed in onion epidermal cells.** Onion cells were transformed with the constructs for detection of subcellular localization of *3 $\beta$ -HSD-GFP*, *P5 $\beta$ R1-GFP*, *P5 $\beta$ R2-GFP* and *GFP* genes. Left, transmitted light images; Right, GFP fluorescence images; scale bar is 100  $\mu$ m.

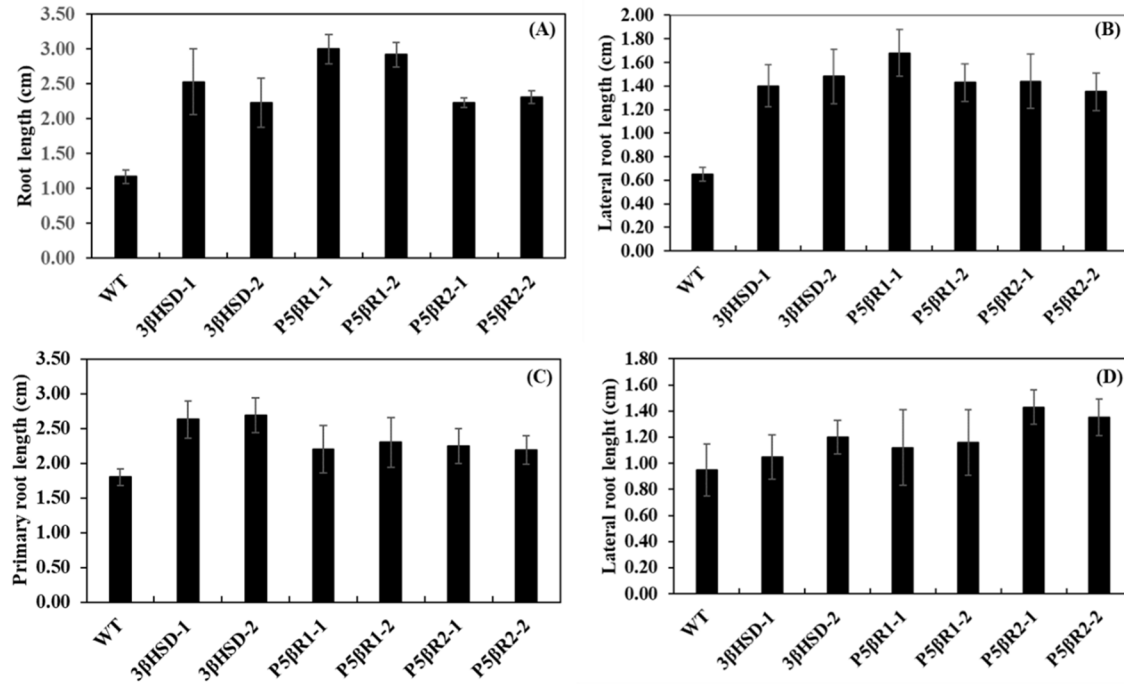

**Supplementary Figure S2** Primary and lateral root lengths of WT and transplastomic lines of the *3β-HSD*, *P5βR1* and *P5βR2* genes under 50 mM and 200 mM NaCl concentrations on MS agar media over one month. (A, C) Primary root lengths of WT and two independent transgenic lines each of the *3β-HSD*, *P5βR1*, and *P5βR2* genes under 50 mM and 200 mM NaCl, (B, D) Lateral root lengths of the seedlings under 50 mM and 200 mM NaCl, (WT, n = 3, transplastomic lines, n=8 for each repeat of each line). Data shows average of three repeats and error bars represent ±SE.

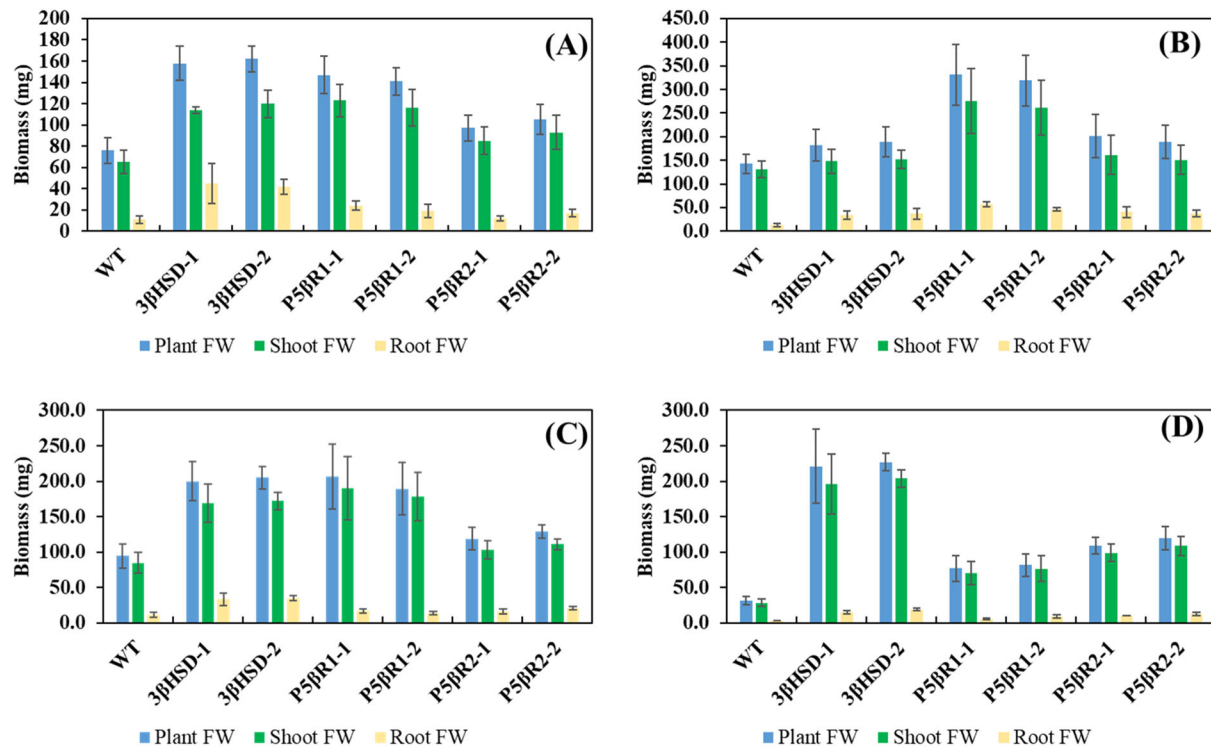

**Supplementary Figure S3. Comparison of biomass of WT and transplastomic lines of the 3 $\beta$ -HSD, P5 $\beta$ R1 and P5 $\beta$ R2 genes under control and various concentrations of NaCl stress.** Fresh biomass of WT and two independent transgenic lines (3 $\beta$ -HSD-1, 3 $\beta$ -HSD-2, P5 $\beta$ R1-1, P5 $\beta$ R1-2, P5 $\beta$ R2-1 and P5 $\beta$ R2-2) of the 3 $\beta$ -HSD, P5 $\beta$ R1 and P5 $\beta$ R2 genes. **(A)** Control treatment, **(B)** 50 mM NaCl, **(C)** 200 mM NaCl and **(D)** 300 mM NaCl. Data shows average of three repeats and error bars represent  $\pm$ SE.

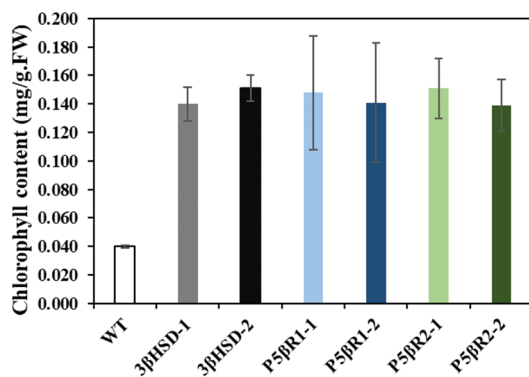

**Supplementary Figure S4. Total chlorophyll content in WT and the independently generated transplastomic lines of 3 $\beta$ -HSD, P5 $\beta$ R1 and P5 $\beta$ R2 genes (3 $\beta$ -HSD-1, 3 $\beta$ -HSD-2, P5 $\beta$ R1-1, P5 $\beta$ R1-2, P5 $\beta$ R2-1 and P5 $\beta$ R2-2).** Data shows average of three repeats and error bars represent  $\pm$ SE.

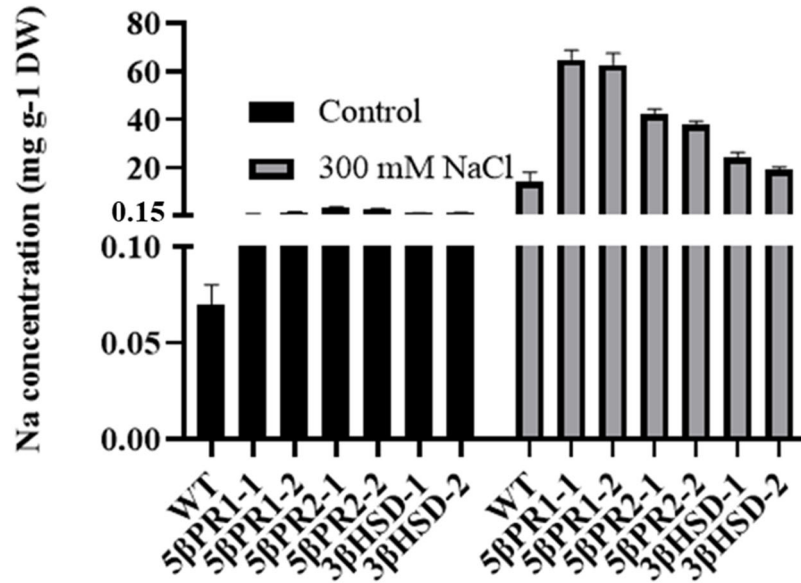

**Supplementary Figure S5. Level of Na concentration in the leaves of transplastomic and WT tobacco seedlings under control condition.** The Na<sup>+</sup> content in WT and the independently generated transplastomic lines of the 3β-HSD, P5βR1 and P5βR2 genes (P5βR1-1, P5βR1-2, P5βR2-1, P5βR2-2, 3β-HSD-1 and 3β-HSD-2) grown without NaCl stress. Data shows average of three repeats and error bars represent ±SE.

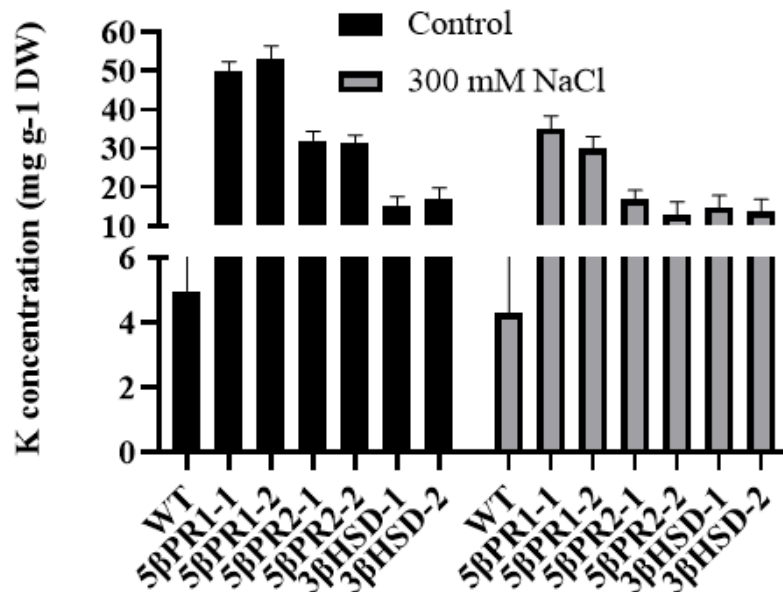

**Supplementary Figure S6. Level of K<sup>+</sup> concentration in the leaves of transplastomic and WT tobacco seedlings under control condition.** The K<sup>+</sup> content in WT and the independently generated transplastomic lines of the 3β-HSD, P5βR1 and P5βR2 genes (P5βR1-1, P5βR1-2,

P5 $\beta$ R2-1, P5 $\beta$ R2-2, 3 $\beta$ -HSD-1 and 3 $\beta$ -HSD-2) grown without NaCl stress. Data shows average of three repeats and error bars represent  $\pm$ SE.
